# Supplementary material
Source: PubMed Central journal article supplement (PMC4623703)
Supplement: NIHMS698452-supplement-1.pdf [file NIHMS698452-supplement-1.pdf]

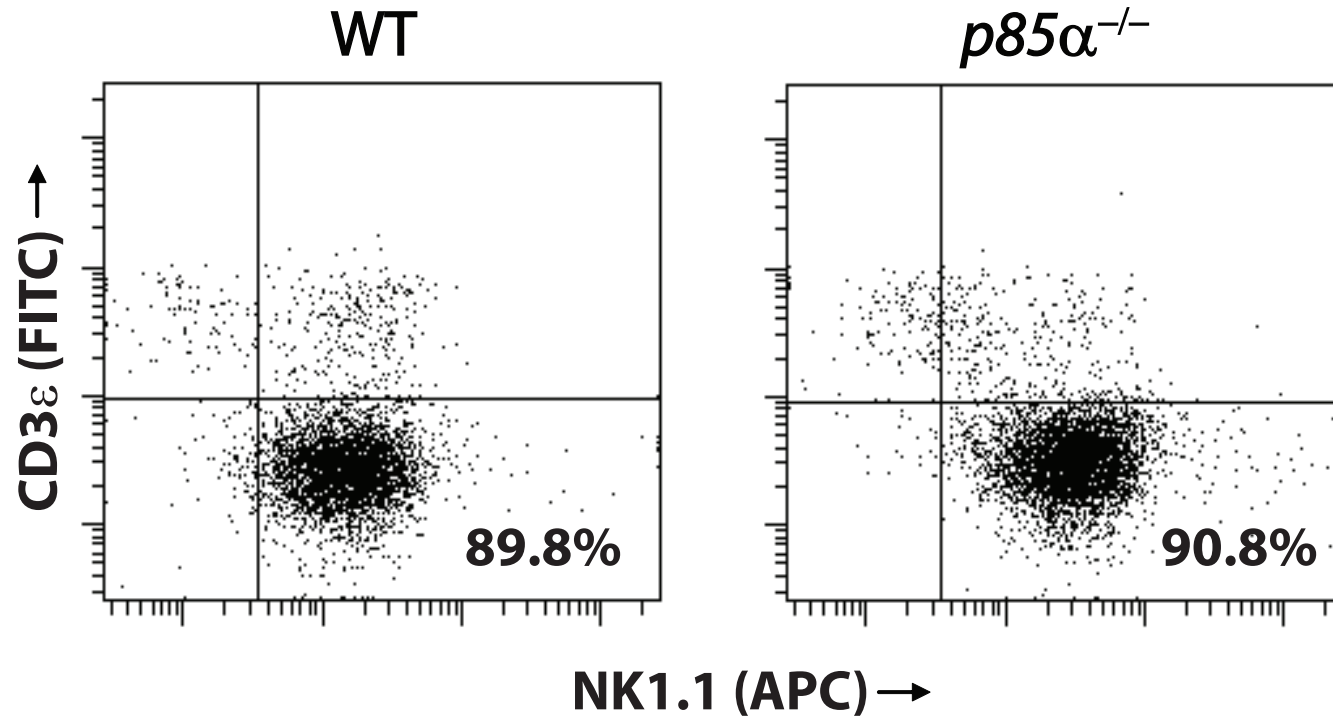

**Supplemental Figure 1** Highly pure NK cell preparations were obtained from WT and  $p85\alpha^{-/-}$  mice. Nylon wool-non-adherent cells were cultured with 1000U/ml of IL2. Floating cells were removed on days 4, 5 and 6 and the remaining adherent cells were replenished with IL2-containing medium to generate highly enriched NK cells. This procedure helped to enrich the CD3 $^{-}$ NK1.1 $^{+}$  NK cell purity to ~90%. Data shown is one representative experiment of more than 20 preparations.
