# Supplementary material
Source: PubMed Central journal article supplement (PMC4623703)
Supplement: NIHMS698452-supplement-2.pdf [file NIHMS698452-supplement-2.pdf]

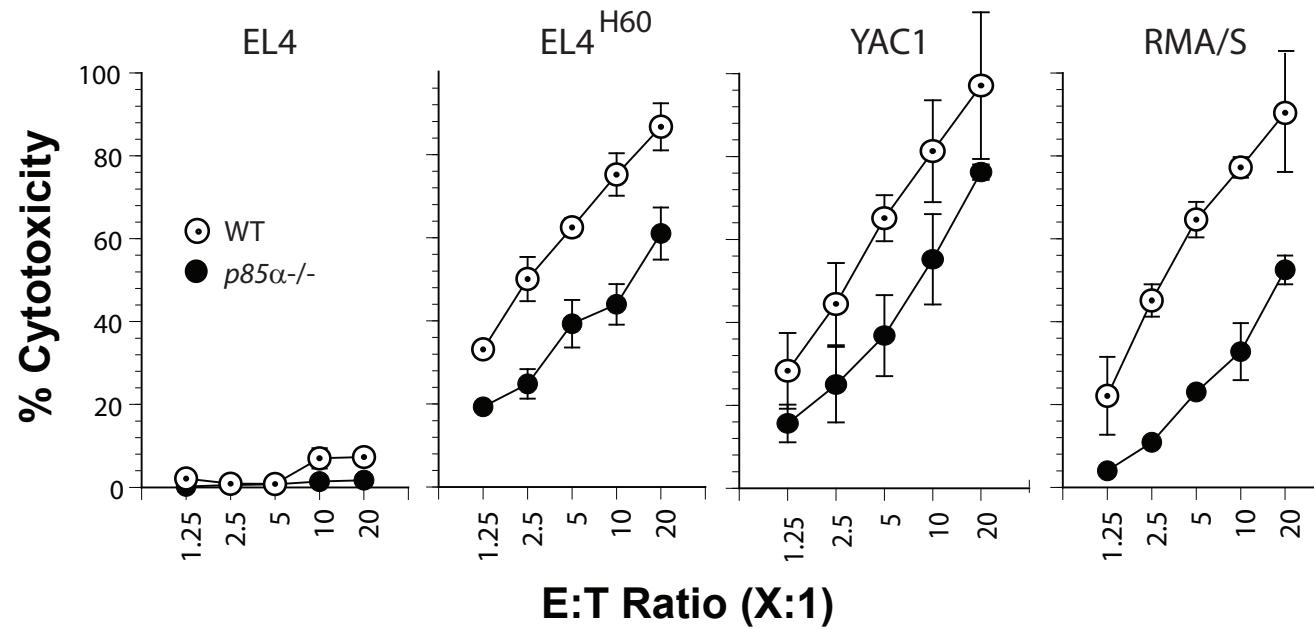

**Supplementary Figure 2** 'Induced-self' and 'missing-self' recognitions of BM derived NK cells are severely impaired in the absence of *p85α*. IL2-activated NK cells were tested against <sup>51</sup>Cr-labeled EL4, EL4<sup>H60</sup>, YAC-1 or RMA/S cells at the indicated E:T Ratios. Data shown are the averages of percent cytotoxicity from 6-8 mice in each category. Open and closed circles represent the NK cells from individual WT and *p85α*<sup>-/-</sup> mice, respectively.
