# Supplementary material
Source: PubMed Central journal article supplement (PMC4623703)
Supplement: NIHMS698452-supplement-3.pdf [file NIHMS698452-supplement-3.pdf]

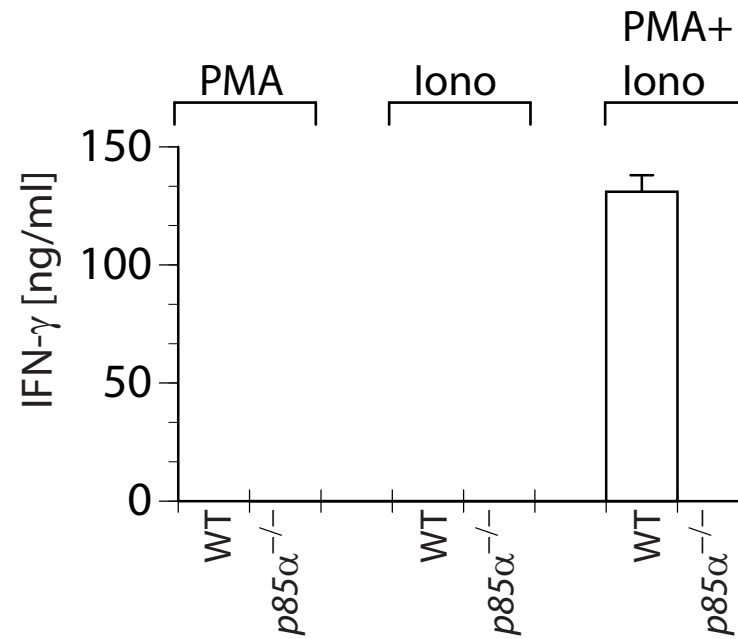

**Supplemental Figure 3** PMA and Ionomycin fail to rescue the IFN- $\gamma$  generation in IL2-activated  $p85\alpha^{-/-}$  NK cells. NK cells from WT and  $p85\alpha^{-/-}$  mice were incubated with PMA (100  $\mu$ g/ml), ionomycin (5 ng/ml) or both for 10 h and the culture supernatants were collected and assayed for the quantity of IFN- $\gamma$  by ELISA.
