# Supplementary material
Source: PubMed Central journal article supplement (PMC4623703)
Supplement: NIHMS698452-supplement-4.pdf [file NIHMS698452-supplement-4.pdf]

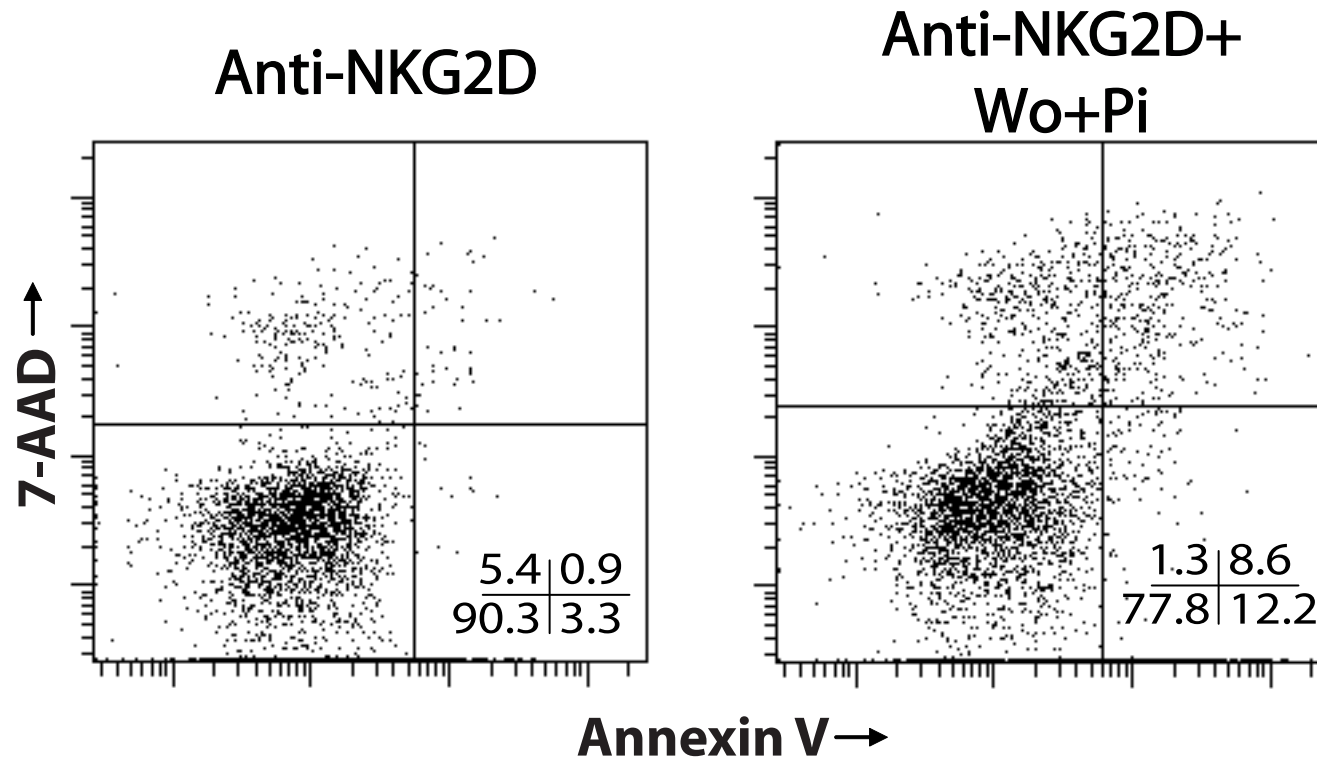

**Supplemental Figure 4** Drug induced toxicity does not account for the reduced cytokine generation. Activation-induced NK cell death was quantified after 16 hrs of incubation with plate-bound anti-NKG2D mAb followed by anti-Annexin-V and 7-AAD staining. Data presented are representative of three independent experiments. Although there was an increase in Annexin V single positive and 7-AAD/Annexin V double positive cells after drug treatment, significant number of cells were still viable.
